# Supplementary material
Source: publisher figshare collection journal article supplement (https://sage.figshare.com/ndownloader/files/14375681)
Supplement: Supplementary file 1 [file 14375681]

Supplementary Table 2. Evaluation of renal arteries by duplex Doppler examination (including increased velocity and/or turbulence) and CT-angiography in patients with SCeAD and FMD in renal arteries. RAR – renal to aorta ratio of blood flow velocity.

|         | Duplex Doppler examination |               | RAR                |                | CT-angiography    |                                                |
|---------|----------------------------|---------------|--------------------|----------------|-------------------|------------------------------------------------|
|         | Left renal artery          | RAR left side | Right renal artery | RAR right side | Left renal artery | Right renal artery                             |
| FMD-30  | -                          | 1.3           | -                  | 1.4            | multifocal FMD    | -                                              |
| FMD-37  | increased velocity         | 3.3           | -                  | 1.7            | saccular aneurysm | multifocal FMD                                 |
| FMD-47  | -                          | 1.2           | -                  | 1.2            | -                 | multifocal FMD                                 |
| FMD-51  | -                          | 1.0           | -                  | 1.4-1.8        | -                 | multifocal FMD                                 |
| FMD-69  | -                          | 1.9           | -                  | 1.5            | multifocal FMD    | multifocal FMD                                 |
| FMD-114 | -                          | 2             | -                  | 2              | multifocal FMD    | multifocal FMD                                 |
| FMD-177 | -                          | 1.7           | increased velocity | 5.3            | -                 | multifocal FMD, suspected significant stenosis |
| FMD-244 | turbulence                 | 1.8           | -                  | 2.0            | multifocal FMD    | -                                              |
